1           **Broccoli sprout Sulforaphane affected hemodynamics and aorta myogenic**  
2           **spontaneous rhythmic contraction in sanitized water uptake mice**

3   Linmei Li<sup>1</sup>, Lingfeng Gao<sup>2</sup>, Ting Wang<sup>1</sup>, Tong He<sup>2</sup>, Jiaying Li<sup>1</sup>, Rifqah Kurnia

4                                           Suwardi<sup>3</sup> Xuan Xu<sup>1</sup>, Yang Wang<sup>#2</sup>

5   1 International nursing college, 2 Extreme environment sports medicine laboratory, 3  
6   Bachelor of medicine and bachelor of surgery section, Hainan medical university,  
7   Haikou 571199, China

8

9

10

11

12

13   **#Correspondence author**

14   Yang Wang

15   Laboratory of extreme environment sports medicine, Hainan medical university

16   No. 3 Chengxi Xueyuan road, Haikou

17   Hainan PFTZ, China 571199

18   **E-mail:** katotds@sina.com

19   **Running title:** *Sulforaphane affected hemodynamics and myogenic spontaneous*  
20   *rhythmic contraction*

21

22

23

24

25

26

27

28

29

30

## Abstract

31 Drinking seawater erodes water source will lead to hemodynamic changes in  
32 cardiovascular system. The erosion affected vascular biomechanics further interrupt  
33 the blood supply in arterial network. In this study, we investigated the carotid arterial  
34 hemodynamics in salinity water fed mice, and the relative spontaneous contraction of  
35 aorta preparation. The biological effect of Broccoli sprout Sulforaphane was assessed  
36 in intake hemodynamic changes. *Kunming* mice were randomly divided into seawater  
37 feeding group, seawater + Sulforaphane group, freshwater feeding group, fresh water  
38 + Sulforaphane group. After 4 weeks of feeding, the pressure waveforms of common  
39 carotid artery were analyzed *in vivo*. The enhanced common carotid arterial pressures  
40 were calculated according to the breakpoint of systolic pressure rising phase. The  
41 ejection time was calculated according to the dicrotic notch. *In vitro*, the isolated aorta  
42 biomechanical features were tested on a micro stepping platform. The passive tension  
43 and relative myogenic spontaneous contraction were evaluated. The results indicated  
44 that in salinity water fed mice heart rate, ejection period were significantly accelerated.  
45 The systolic pressure breakpoint of the ascending phase was significantly increased;  
46 however, the central aortic pressure augment index was decreased. *In vitro* study, the  
47 isolated aorta preparations indicated remarkable myogenic spontaneous contraction in  
48 salinity water fed mice. The spontaneous contraction indicated a significant cycle  
49 pattern, the waveform cluster changes regularly in one cycle, maximal amplitude of  
50 myogenic autonomic contraction increased significantly. Spontaneous contraction  
51 became more active, however cycle duration shortened. In biological effect of  
52 Broccoli sprout supplement, Sulforaphane was effective in reducing the heart rate,  
53 prolonging ejection period, improving systolic pressure and pulse pressure amplitude  
54 in salinity water fed mice. We concluded that long-term salinity water uptake can  
55 form a new hypertension model in mice, which can affect the changes of carotid  
56 artery hemodynamics and local blood supply. The Broccoli sprout Sulforaphane can  
57 improve the high systolic blood pressure and ejection period of artery, and its  
58 mechanism needs further study.

59 **Key words:** Salinity water uptake, Broccoli sprout Sulforaphane, Carotid arterial  
60 pressure, Myogenic spontaneous contraction

61

62

63

64

65

66

67

68

69

70

71

72

73

74

75

76

77

78

79

80

81

82

83

84

85

86

87

## 88 **Introduction**

89 The problem of hypertension caused by long-term intake of salinity water has always  
90 been a concern of coastal countries and regions. Due to the melting of ice layer and  
91 the expansion of sea water caused by climate variation, the sea level average annual  
92 rises 3.2mm<sup>[1]</sup>, therefore cause high salinity erosion, which will have a lot of negative  
93 effects on domestic potable water sources. The high salinity water source is a  
94 prominent problem in coastal areas. High salinity drinking water can lead to  
95 cardiovascular disease, which is represented by hypertension and accompanied by  
96 increased vascular resistance with abnormal vascular function and structure. Although  
97 marine lipids, especially omega-3 polyunsaturated fatty acids (PUFAs),  
98 eicosapentaenoic acid (EPA) and docosahexaenoic acid (DHA) in infiltrate potable  
99 water, has a positive effect on preventing and alleviating chronic diseases. In recent  
100 years, it has been found that trace seawater can improve the balance of trace elements  
101 <sup>[2]</sup>, prolong the endurance of mice, reduce the oxygen consumption during exercise,  
102 and reduce the values of aspartate aminotransferase (AST), creatine kinase (CK) and  
103 creatine muscle enzyme isoenzyme (CK-MB) value has a certain effect <sup>[3]</sup>, improve  
104 the tolerance to high temperature <sup>[4]</sup>. However, the high incidence of hypertension  
105 caused by high salinity of seawater is still highly concerned, especially the abnormal  
106 lipid metabolism caused by abnormal copper and zinc metabolism, which is the cause  
107 of cardiovascular diseases such as hypertension, hyperlipidemia and atherosclerosis.  
108 Studies have shown that the blood copper, zinc, calcium and magnesium of rats fed  
109 with desalinated seawater were higher than those fed with fresh water, and the blood  
110 iron content decreased <sup>[5]</sup>. In the coastal areas of Bangladesh, drinking seawater  
111 erosion water cause maternal blood pressure increase, seriously affect maternal and  
112 fetal health. However, there was no significant correlation between the higher salt  
113 content water source living in inner Arizona and the rising prevalence of hypertension  
114 <sup>[6]</sup>, which suggested the different pathogenesis between hypertension caused by high  
115 salinity water eroded by seawater and hypertension caused by improper intake of  
116 daily edible salt, so the possible negative effects of multi-ionic components of

117 seawater on cardiovascular system are considered. The studies shown that the average  
118 salt intake of 5g / day people had an increasing of systolic blood pressure 9mmHg  
119 who live in the coastal area of the bay of Bengal, while the systolic blood pressure  
120 caused by seawater salinity can reach to 120-139mmHg (even > 140mmHg in some  
121 cases, the diastolic blood pressure can reach to 80-89mmHg<sup>[7]</sup>. In the coastal areas of  
122 Vietnam, Bangladesh and India, salinization of drinking water has caused adverse  
123 effects on the health of more than 25 million people, resulting in the spread of  
124 hypertension and cardiovascular problem<sup>[8]</sup>. At present, scholars believe that millions  
125 of coastal residents are also at risk of hypertension and related diseases. It is urgent to  
126 conduct further research on seawater erosion and drinking water after desalination, so  
127 as to understand the health problems caused by marine water environment<sup>[9]</sup>.

128 The risk of high sodium intake in drinking erosion water is usually higher than that in  
129 food. However, the research in this area is basically blank, and the risk of seawater  
130 erosion of drinking water sources on blood pressure and cardiovascular disease is still  
131 unknown. Broccoli sprout Sulforaphane (SFN) is a molecule within the isothiocyanate  
132 (ITC) group of organosulfur compounds, which originally isolated from broccoli, a  
133 cruciferous vegetable. As the active component of its anti-inflammatory, SFN inhibit  
134 the proliferation and migration of hVSMCs induced by Ang II, and reduce the  
135 adhesion of monocytes to hVSMCs by reducing the levels of ICAM1 and VCAM1.

136 In order to provide a new experimental animal model for drug development, we  
137 designed the seawater water fed hypertension model for observing the hemodynamic  
138 characteristics of mice arterial system. We investigated the intake of SFN from  
139 cauliflower shoots, and explored the effect of Broccoli sprout crude extracted SFN in  
140 this hypertension model.

141

## 142 **Method**

### 143 *Animal grouping*

144 *Kunming* mice were provided and raised by the laboratory animal center of Hainan  
145 medical university (animal Certificate No.: 2018a044). 3-week-old male *Kunming*

146 mice (n=20) were randomly divided into 1) Seawater fed and ordinary granulated  
147 food mice (hereinafter referred to as salinity group), which were further divided into  
148 salinity group (n = 5, sl) and salinity + supplement group (n = 5, sls). 2) The control  
149 group was fresh water and food feeding (hereinafter referred to as sanitary group),  
150 which were further divided into sanitary group (n = 5, sn) and sanitary + supplement  
151 group (n = 5, sns). In supplement feeding group, the Broccoli sprout crude extracted  
152 fluid gavage feeding twice per day and continued 4 weeks.

153

#### 154 *Hemodynamic measurement*

155 Mice anesthetized with 3% Pentobarbital Sodium (0.1ml/20g body weight,  
156 intraperitoneal injection), spray air to corneal reflexes with a pipette to confirm  
157 anesthetic effect. After fix the anesthetized mice on a wooden board in supine position,  
158 left common carotid artery was bluntly dissected through the midline incision of the  
159 neck. A polyethylene catheter ( $\phi=1$  mm) was inserted into the common carotid artery  
160 from the incision centripetally. After ligation and fixation with silk thread, the blood  
161 pressure (PA) were monitoring through the common carotid artery. During monitoring,  
162 the pressure sensor should be consistent with the heart level. The characteristic  
163 waveforms of each stage of common carotid artery pressure are shown in **Figure 1**.  
164 The BL-420S data acquisition & analysis system recorded the pressure data.  
165 TM\_wave software (ver 2.0) calculated central systolic pressure (CSP), central  
166 diastolic pressure (CDP), central pulse pressure (CPP) and carotid flow enhancement  
167 index (Faix (%) =  $\text{cap} / \text{CPP} * 100$  (%)<sup>[10]</sup>. According to the obvious characteristics of  
168 the inflection point (PI) of the ascending branch of the common carotid artery systolic  
169 pressure at the end of inspiration, the inflection point of the common carotid artery  
170 systolic pressure at the end of inspiration in five breathing cycles was randomly  
171 selected to calculate the central augmentation pressure (CAP), and the ejection  
172 duration was calculated according to the distance between the rising starting point of  
173 systolic pressure and the notch of the beat wave.

174

175

176

177

178

179

180

181

182

183

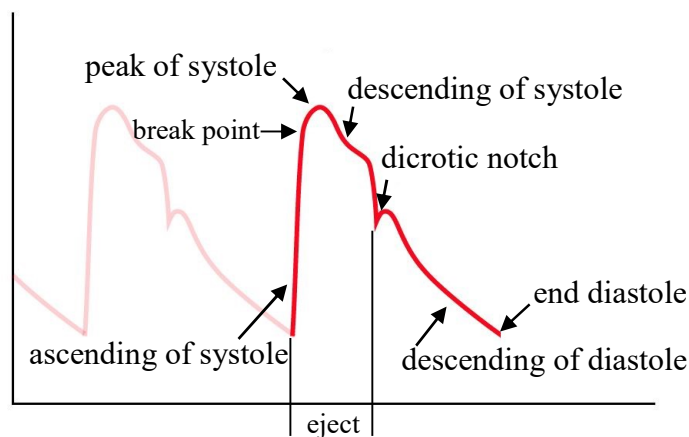

184

**Figure 1** Carotid arterial waveform diagram

185

#### 186 *Aorta mechanical lengthening tests in vitro*

187 The proximal segments of aorta were isolated under the binocular dissecting  
188 microscope (pxs-2040, Shanghai Optical Instrument Factory, Shanghai, China). After  
189 removing the outer connective tissue, the aorta intima and smooth muscle layer were  
190 prepared. For further studies, the preparations were bath in *Ringer's* solution with a  
191 constant temperature bath chamber (37 °C). Two preparations were prepared for each  
192 mouse.

193 The lengthening test was operated on a stepper motor driving roller screw platform.  
194 As shown in **Figure 2**, preparation side hooked on the glass probes. One side glass  
195 probe was fastened to a roller screw module; the other was connected to the reed of  
196 Wheatstone bridge-type piezoelectric strain sensor (Model number JH-2 10g, Beijing  
197 aerospace medical engineering institute, Beijing China). The roller screw module was  
198 installed on the vibration isolation platform (dst10-08, Jiangxi Liansheng  
199 experimental equipment) Equipment Co., Ltd., Shangrao, Jiangxi) to avoid  
200 environmental vibration interference. Preparations were kept horizontally on a 4°C  
201 chilled glass slide. The mechanical lengthening was operated by stepper motor which  
202 was controlled by Arduino Uno R3 board (Arduino, Allchips Ltd., Hong Kong). In  
203 order to obtain the steady mechanical lengthening in each stretch, the strengthen was

204 determined by the rotating speed and the angles of stepper motor shaft which was  
205 driven by programmed pulse frequency of the Arduino board.

206

207

208

209

210

211

212

213

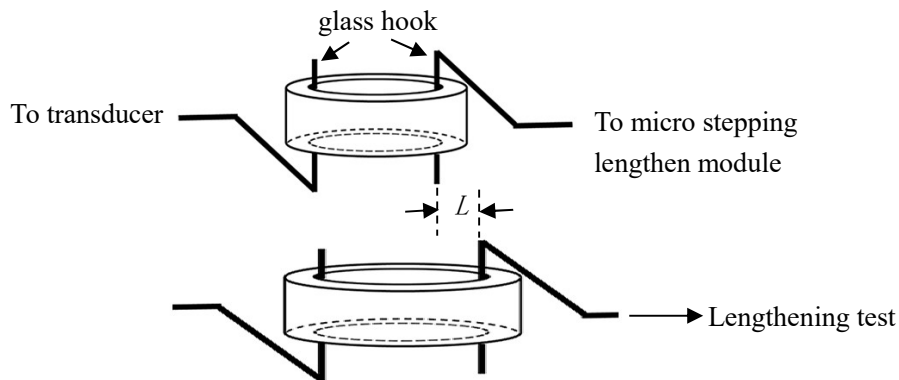

214

**Figure 2** The schema of aorta lengthening loading test

215

216 As the procedure in **Figure 2**, the fixed preparations were slacked in *Ringer's* solution,  
217 stabilize 5 min, then slowly manually turn the module, slightly stretch the preparation  
218 bearing 1g preload. The preparation length at this moment was defined as the initial  
219 length ( $L_0$ ). After the passive tension of the preparation was stabilized, the module  
220 was turned instantly. The preparations were passively elongated once based on its  $L_0$   
221 (**Figure 2**, the distance marked with  $L$  means the optimal length  $L_0$  or rapid  
222 lengthening ( $L_0 + x$ ). The passive tensions were traced and recorded by BL-420S data  
223 acquisition & analysis system. The myogenic spontaneous contraction and the  
224 characteristics of each contraction cycle was calculated and compared by TM\_wave  
225 software (ver 2.0).

226

### 227 *Statistics*

228 The data were presented as Mean  $\pm$  Standard Error of Mean ( $\bar{x} \pm \text{SEM}$ ). Paired  
229 sample double population t-test was used for comparison between groups. Excel 2013  
230 software (Microsoft Office Professional Plus 2013, Microsoft Corporation) for  
231 statistical analysis.  $p < 0.001$  was statistically significant.

232



233 **Results**

234 *The body weight between salinity and sanitary group*

235 The average body weight was  $34.70 \pm 2.90\text{g}$  ( $n = 10$ ) in salinity group, and  $31.60 \pm$   
236  $1.90\text{g}$  ( $n = 10$ ) in sanitary group. No significant difference between two group. After 4  
237 weeks feeding, the body weight salinity groups significantly increased ( $53.77 \pm 5.02\text{g}$ ,  
238  $n = 5$ , 155% increased; while  $51.04 \pm 4.72\text{g}$ ,  $n=5$ , 162% increasing in sanitary group).  
239 However, in supplement groups, the body weight was not significantly increased  
240 ( $47.81 \pm 3.59\text{g}$ ,  $n=5$ , 138% increasing in salinity + supplement group;  $49.32 \pm 3.55\text{g}$ ,  
241  $n=5$ , 156% increasing in sanitary group). The body weight in supplement groups were  
242 significantly reduced ( $p < 0.001$ ).

243

244 *The carotid arterial pressure waveform patterns in salinity mice group*

245 In salinity group, the pressure waveform of common carotid artery changed  
246 significantly. The frequency of pressure waves significant increased. The pressure  
247 waves have a sharp peak of systole, that combining with a decrease rate of diastolic  
248 blood pressure accelerated. The ejection period (**ED**) shortened significantly. The  
249 amplitude of pulse pressure (**cPP**) increased significantly. Therefore, the break point  
250 of systole and the dicrotic notch were smoothing, and lost its normal pattern (**Figure**  
251 **3a** sanitary mice, **Figure 3b** salinity mice). The characteristic wave pattern in salinity  
252 mice were the break point elevation significantly, resulting in the decrease of **cAP**. In  
253 salinity + supplement group, the elevations were rectified, which showed **cAP**  
254 increased. In salinity mice, heart rate (HR) significant increased ( $742.99 \pm 24.99$  BPM  
255 and  $698.12 \pm 6.29$  BPM in salinity group and salinity + supplement group,  $448.36 \pm$   
256  $18.24$  BPM and  $427.19 \pm 23.13$  BPM in sanitary group and sanitary + supplement  
257 group).

258

259

260

261

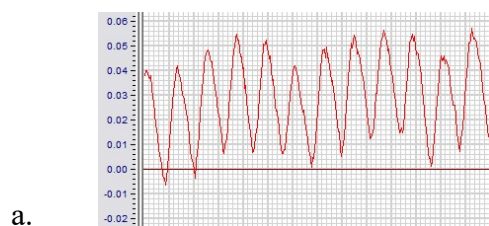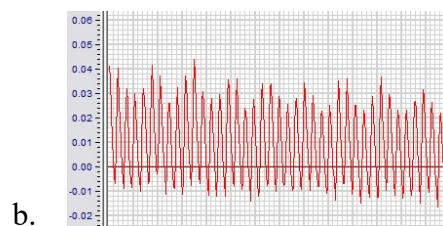

262 **Figure 3** The carotid arterial pressure waveform in salinity and sanitary mice

263

264 *The cardiac output in salinity with supplement mice*

265 The **CSP**, **CDP** and **cPP** in salinity group were significantly higher than those in  
266 sanitary group ( $21.42 \pm 0.25\text{kPa}$ ,  $9.47 \pm 0.22\text{kPa}$  and  $11.95 \pm 0.32\text{kPa}$  in salinity  
267 group;  $18.27 \pm 0.35\text{kPa}$ ,  $10.07 \pm 0.23\text{kPa}$  and  $8.20 \pm 0.41\text{kPa}$  in salinity + supplement  
268 group). However, it was  $13.13 \pm 0.47\text{ kPa}$ ,  $6.52 \pm 0.22\text{ kPa}$  and  $6.61 \pm 0.46\text{ kPa}$ ,  $11.53$   
269  $\pm 0.19\text{ kPa}$ ,  $6.43 \pm 0.13\text{ kPa}$  and  $5.10 \pm 0.23\text{ kPa}$  in sanitary group and sanitary +  
270 supplement group.

271 **Figure 4** presented the statistic parameters comparison among the groups. The  
272 column bar with blank indicated the parameters in salinity and sanitary group, while  
273 the column bar with gray were the parameters in salinity + supplement and sanitary +  
274 supplement group. In **Figure 4a**, b and c, mark (a)\*\*\* was the statistic comparison  
275 result between salinity group and sanitary group, (b)\*\*\* was the comparison result  
276 between salinity + supplement group and sanitary + supplement group. The figures  
277 indicated the significant differences in **CSP**, **CDP** and **cPP** between salinity and  
278 sanitary mice (\*\*\* means  $p < 0.001$ ); The mark (c) \*\*\* was the statistic comparison  
279 between salinity + supplement group and sanitary + supplement group (\*\*\* means  
280 significant difference,  $p < 0.001$ ). The mark (d)\*\*\* in **Figure 4c** was the comparison  
281 between salinity group and sanitary group (\*\*\* means significant difference,  $p <$   
282  $0.001$ ), mark (e) \*\*\* was the ratio comparison between the salinity + supplement  
283 group and sanitary + supplement group (\*\*\* means significant difference,  $p < 0.001$ ).  
284 Based on the above results, we concluded that salinity water feeding significantly  
285 increase **CSP** and **cPP** in mice circulation system. However, no statistic significant  
286 difference in **CDP**. SFN supplement reduce the **CSP**, improve the **cPP**, but no  
287 significant effect on **CDP**.

288

289

290

291

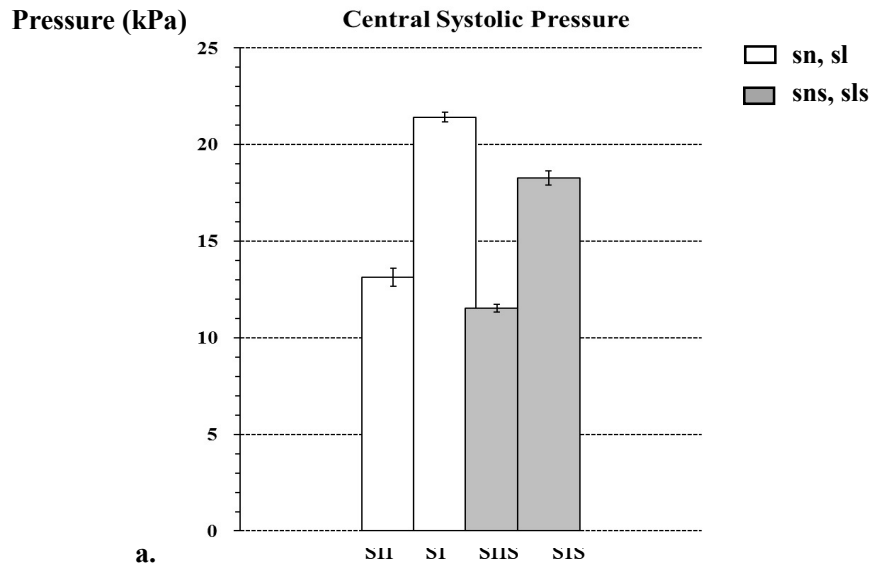

292

293

294

295

296

297

298

299

300

301

302

303

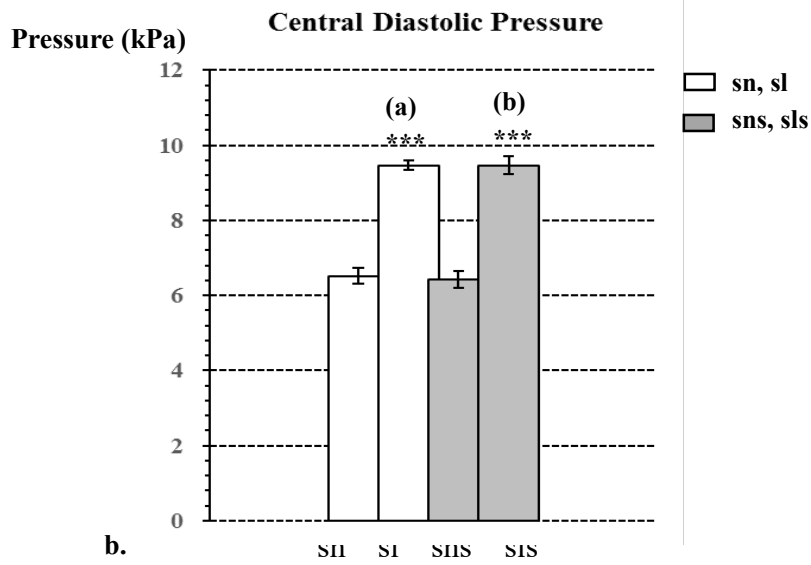

304

305

306

307

308

309

310

311

312

313

314

315

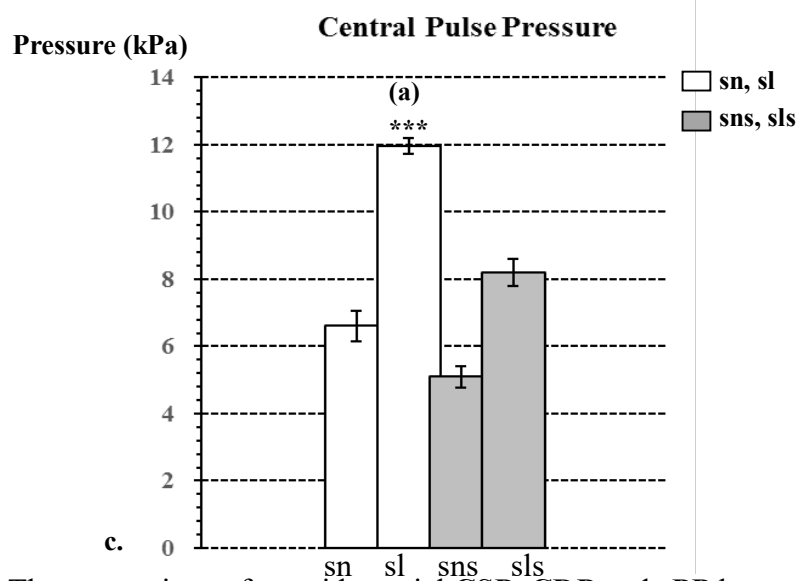

316

317

318

319

320

321

322

323

324

325

326

327

**Figure 4** The comparison of carotid arterial **CSP**, **CDP** and **cPP** between salinity and sanitary groups

328

329 The **FAIx** were  $71.82 \pm 1.40$ ,  $89.73 \pm 3.17$  in salinity group and salinity + supplement  
330 group, and  $80.24 \pm 3.16$ ,  $91.02 \pm 3.39$  in sanitary group and sanitary + supplement  
331 group. **Figure 5** presented the comparison of **FAIx** between salinity and sanitary  
332 group, in which mark (a) \*\*\* was the statistic comparison result of **FAIx** between  
333 salinity group and sanitary group (\*\*\*) means significant difference,  $p < 0.001$ ); mark  
334 (b)\*\*\* and (c)\*\*\* were the statistic comparison result of **FAIx** between supplement  
335 and non-supplement in each group (\*\*\*) means significant difference,  $p < 0.001$ ). The  
336 results indicated that **FAIx** in salinity group was decreased, which may lead to the  
337 decrease of common carotid artery blood flow and local blood supply insufficiency in  
338 mice. However, supplement improved the **FAIx** in both group, which further suggest  
339 its improvements in common carotid artery blood flow and local blood supply  
340 insufficiency.

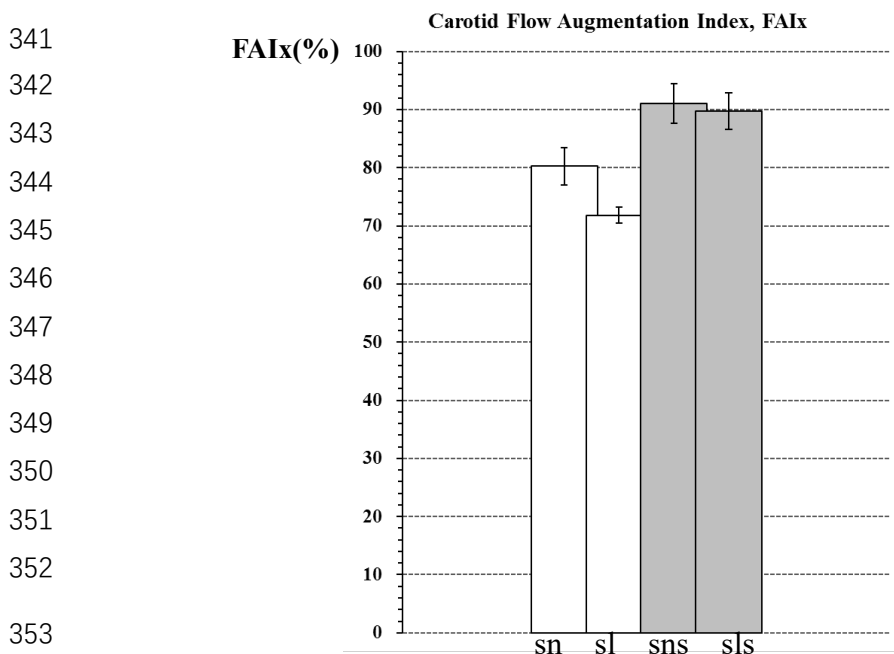

354 **Figure 5** **FAIx** comparison in salinity and sanitary group

355

356 *The isolated carotid arterial preparation myogenic spontaneous contraction in*  
357 *salinity and supplement group*

358 The maximal amplitude of myogenic spontaneous contractile was significantly  
359 increased in salinity mice, while the interval between the maximal amplitude was  
360 significantly shortened, and the frequency of wave clusters between the maximal

361 amplitude was significantly increased (**Table 1**). This indicated seawater feeding  
362 evoked myogenic spontaneous contraction in aorta preparation. This myogenic  
363 spontaneous contraction response enhanced arterial resistance, leading to the decrease  
364 of **FAIx**, thereby reducing the blood flow and local blood supply. The effects of  
365 supplement was improvement of pulse pressure difference, but not the myogenic  
366 spontaneous contraction in salinity mice.

367 **Table 1** Aorta myogenic spontaneous contraction pattern in salinity and sanitary  
368 group

|     | Maximal amplitude (g) | Period of single cycle (sec) | Cluster in single cycle (time) |
|-----|-----------------------|------------------------------|--------------------------------|
| sn  | 6                     | 3.5                          | 8                              |
| sns | 5                     | 3.7                          | 7                              |
| sl  | 16                    | 1.5                          | 8                              |
| sls | 9                     | 2.4                          | 7                              |

369

## 370 **Discussion**

371 Due to global climate variation, sea-level rise and various climate anomalies,  
372 salinization of water sources in coastal areas and its harm to the human circulation  
373 system have been paid more and more attention. Salinity in water is not expressed as a  
374 percentage in oceanography, but as a thousandth. The salinity of seawater is between  
375 35 and 37 PPT, which can be quantified by measuring its conductivity. The higher the  
376 salinity is, the stronger the conductivity is. Salt comes from the dissolution of mineral  
377 water on the land and the deposition of solid and gaseous substances from the earth's  
378 crust by rivers into the ocean, so the composition of electrolyte is more complex.  
379 Moreover, the change of salinity is related to the interaction of Ocean region, climate  
380 and global water cycle. In this experiment, the conductivity method was used to  
381 compare the conductivity between seawater and brine at room temperature, and then  
382 the salinity of seawater used in the experiment was calculated. The salinity of  
383 seawater used in the experiment was equivalent to 35% of brine (data is not shown).  
384 It has been reported that  $Mg^{2+}$ ,  $Ca^{2+}$  and  $K^{+}$  in seawater are considered to have  
385 positive effects on the prevention of cardiovascular diseases. The effects of refining  
386 the mineral composition of deep seawater to 1000 hardness on the cardiovascular

387 hemodynamics of rabbits after feeding showed that systolic blood pressure, diastolic  
388 blood pressure, pulse pressure, mean arterial pressure and total peripheral resistance  
389 decreased significantly. The slight increase of serum  $Mg^{2+}$  level in deep sea water  
390 group may not explain the inhibitory effect of mild hypertension<sup>[11]</sup>. However, the  
391 effect of normal seawater on cardiovascular system is negative. According to the  
392 research on the correlation between seawater and hypertension, it is believed that the  
393 high prevalence of hypertension in Alaska and Mekong Delta is due to the intake of  
394 seawater<sup>[12,13]</sup>. The broad studies also show that there are genetic factors in the  
395 relationship between high salt diet and hypertension, and salt sensitive people are  
396 more likely to have hypertension. The salt sensitive hypertension mouse model is  
397 characterized by salt sensitive hypertension due to the decrease in water sodium  
398 retention and depletion of renal sodium excretion, and the decrease of salt excretion is  
399 related to the renin-angiotensin-aldosterone system (RAAS)<sup>[14]</sup>. In this study, we  
400 explicated the significantly different and unique carotid arterial blood pressure  
401 waveforms in the seawater feeding mice (salinity mice), which may belong to a new  
402 type of hypertension animal model. This included seawater feeding accompanied  
403 increasing of systole pressure and the significant myogenic spontaneous contraction  
404 pattern of aorta segment.

405 **FAIx** is a parameter describing the multiple relation between blood arteries and  
406 cardiac ventricles. It is related to the amplitude of the wave formed by the increase of  
407 left ventricular suction and the increase of blood pressure caused by the reflection of  
408 pressure wave. **FAIx** was more closely related to aortic pulse velocity, aortic  
409 compliance and elastic / muscle pulse velocity ratio. **FAIx** increased with the increase  
410 of the degree of arteriosclerosis. In this study, it indicated that **FAIx** was tightly  
411 relative to the myogenic spontaneous contraction in seawater feeding mice. The  
412 increased myogenic spontaneous contraction became more significant with the  
413 increase of arterial pressure and volume load, which may limit the blood flow in the  
414 arterial circulation. In recent scientific reports, it suggested that the changes of  
415 cerebral blood flow associated with large arteries may be related to **FAIx** variation<sup>[15]</sup>.

416 In seawater feeding mice, if the low **FAIx** relative to the cerebral blood supply  
417 insufficiency remains to need confirmed. Nevertheless, the phenomenon of cerebral  
418 blood supply insufficiency caused by low **FAIx** may provide a new research interests.  
419 Oral administration of seawater and gastrointestinal absorption of seawater are also  
420 effective ways to produce specific hemodynamic changes. Seawater can only be  
421 absorbed through the stomach and intestines to have a significant effect on the  
422 circulatory system, while the effect of other ways is very limited. According to the  
423 side effects of psoriasis patients treated with high salt seawater from the dead sea,  
424 1142 psoriasis patients with hypertension were evaluated in the investigation. The  
425 decrease of diastolic and systolic blood pressure was not significant. The high salt  
426 environment in the dead sea had no significant side effects on the treatment of  
427 hypertension for psoriasis patients<sup>[16,17]</sup>. Long term immersion in high salt seawater  
428 from the dead sea could improve blood pressure<sup>[18,19]</sup>. Based on these reports, it can  
429 be concluded that oral uptake is the main way to cause seawater hypertension, while  
430 long-term seawater immersion and percutaneous contact will not have a negative  
431 impact on systemic blood pressure.

432 Sulforaphane is a metabolite of glucoraphanin (Grn), which in turn is the main  
433 glucosinolate (GLS) in broccoli. The production of sulforaphane is only possible  
434 when this is released due to plant injury. For example, chewing will chemically change  
435 the structure of glucoraphanin in conjunction with the enzyme myrosinase.  
436 Furthermore, this action will release glucose and sulfate, leaving the sulforaphane  
437 (SFN) molecule free to function. However, ITC and sulforaphane cytoprotective  
438 effect as an indirect antioxidant is associated with the fact that they can conjugate  
439 with glutathione (GSH), contributing to phase activation II enzymes and scavenging  
440 of ROS. Besides this, SFN can regulate the nuclear factor erythroid-derived 2-  
441 (NF-E2) related factor 2- (Nrf2-) antioxidant response element (ARE) pathway.  
442 Consequently, this action upregulates the expression of a range of antioxidant  
443 enzymes, including HO-1, NQO1, GST,  $\gamma$ -glutamyl cysteine ligase (GCL), and  
444 glutathione reductase (GR). The SFN-mediated protection against platelet aggregation

445 has been well- documented. It is believed that SFN can decrease collagen-induced  
446 glycoprotein IIb/IIIa activation and thromboxane A2 formation. The ingestion of SFN  
447 resulted in a lower concentration of oxidized GSH, increased GR and GPx activity.  
448 Consequently, these improvements reflected in better endothelial relaxation and lower  
449 blood pressure.

450 In conclusion, we suggest that seawater feeding (sanitized water drinking) cause  
451 significant changes in the waveform of the common carotid artery, raise the break  
452 point of the ascending branch of systole pressure, reduce the central artery pressure,  
453 thus reducing the blood flow. As an important anti-inflammatory component, **broccoli**  
454 sprout sulforaphane reduced the systolic blood pressure of common carotid artery in  
455 seawater feeding mice. It could may be a potential compound to reverse the  
456 pathological changes of cardiovascular problem through its anti-oxidative stress  
457 pathways.

458

#### 459 **Acknowledgement**

460 This study was sponsored by national college student innovation and entrepreneurship  
461 project (No. 201911810021).

462

#### 463 **Reference**

464 1 Satellite sea level observations. NASA Goddard Space Flight Center ,  
465 [ftp://podaac.jpl.nasa.gov/allData/merged\\_alt/L2/TP\\_J1\\_OSTM/global\\_mean\\_sea\\_lev](ftp://podaac.jpl.nasa.gov/allData/merged_alt/L2/TP_J1_OSTM/global_mean_sea_level/GMSL_TPJAOS_4.2_199209_201801.txt)  
466 [el/GMSL\\_TPJAOS\\_4.2\\_199209\\_201801.txt](ftp://podaac.jpl.nasa.gov/allData/merged_alt/L2/TP_J1_OSTM/global_mean_sea_level/GMSL_TPJAOS_4.2_199209_201801.txt)。

467 2 Hataguchi Y, Tai H, Nakajima H, et al . Drinking deep-seawater restores mineral  
468 imbalance in atopic eczema /dermatitis syndrome. Eur J Clin Nutr, 2005, 59:  
469 1093-1096 .

470 3 Weiming Li, Jin Cui, Pengyuan Xu, et al. Effects of Deep Sea Water on Endurance  
471 of Mice. Nat Prod Res Dev, 2013, 25: 826-829.



- 472 4 Youguo Dai, Weiming Li, Huirong Tang, Anhua Shi, Ping Gan, Yingli Cun, Qin  
473 Liu, Qiongyao Guan, Jin Cui. Effect of physiological deep-sea water on the  
474 hyperthermal tolerance of mice. *Chongqing Medicine*, 2016, 1:33-36.
- 475 5 Lixia Zhang, Ming Zhang, Lian Duan. Effect of drinking desalinated seawater on  
476 Copper, Zinc, Calcium, Magnesium and Iron in rats blood. *Journal of Environmental*  
477 *Hygiene*. 2015, 5(5):427-430.
- 478 6 Welty TK, Freni-Titulaer L, Zack MM, et al. Effects of exposure to salty drinking  
479 water in an Arizona community. Cardiovascular mortality, hypertension prevalence,  
480 and relationships between blood pressure and sodium intake. *JAMA*, 1986,  
481 255(5):622-666.
- 482 7 Vineis P, Chan Q, Khan A. Climate change impacts on water salinity and health. *J*  
483 *Epidemiol Glob Health*. 2011, 1(1):5-10.
- 484 8 Hoque MA, Scheelbeek PF, Vineis P, et al. Drinking water vulnerability to climate  
485 change and alternatives for adaptation in coastal South and South East Asia. *Clim*  
486 *Change*. 2016, 136:247-263.
- 487 9 Scheelbeek PF, Khan AE, Mojumder S, et al. Drinking Water Sodium and Elevated  
488 Blood Pressure of Healthy Pregnant Women in Salinity-Affected Coastal Areas.  
489 *Hypertension*. 2016, 68(2):464-470.
- 490 10 Shim CY. Arterial-Cardiac Interaction: The Concept and Implications. *J*  
491 *Cardiovasc Ultrasound*. 2011, 19(2):62.
- 492 11 Katsuda S, Yasukawa T, Nakagawa K, et al. Deep-sea water improves  
493 cardiovascular hemodynamics in Kurosawa and Kusanagi-Hypercholesterolemic  
494 (KHC) rabbits. *Biol Pharm Bull*. 2008, 31:38-44.
- 495 12 Beaulieu-Jones BR, O'Brien DM, Hopkins SE, et al. Sex, Adiposity, and  
496 Hypertension Status Modify the Inverse Effect of Marine Food Intake on Blood  
497 Pressure in Alaska Native (Yup'ik) People. *J Nutr*. 2015, 145(5):931-938.
- 498 13 Talukder MRR, Rutherford S, Chu C, et al. Association between salinity and  
499 hospital admission for hypertension: an ecological case-control study in the Mekong  
500 Delta Region in Vietnam[J]. *J Public Health (Oxf)*, 2018, 40(1):75-81.

- 501 14 Shani J, Seidl V, Hristakieva E, et al. Indications, contraindications and possible  
502 side-effects of climatotherapy at the Dead-Sea[J]. *Int J Dermatol*, 1997, 36:481-492.
- 503 15 Hashimoto J, Westerhof BE, Ito S. Carotid Flow Augmentation, Arterial Aging,  
504 and Cerebral White Matter Hyperintensities[J]. *Arterioscler Thromb Vasc Biol*.  
505 2018,38:2843-2853.
- 506 16 Shani J, Kushelevsky AP, Harari M, et al. Sustained decrease of blood pressure in  
507 psoriatic patients during treatment at the Dead Sea. *Pharmacol Res*. 1995, 31:355-359.
- 508 17 Kushelevsky AP, Harari M, Hristakieva E, et al. Climatotherapy of psoriasis and  
509 hypertension in elderly patients at the Dead-Sea. *Pharmacol Res*. 1996,34:87-91.
- 510 18 Bernheim J, Saidi J, Kovatz S, et al. Decrease in blood pressure in the Dead Sea  
511 region. *Isr J Med Sci*. 1984, 20:1193-1194.
- 512 19 Gavrikov NA, Platonov BP. Radiotelemetric study of neural regulation of the  
513 heart in patients with hypertension treated with seawater baths. *Ter Arkh*. 1976,  
514 48:76-81.
